# Supplementary material for: The Chicken Frizzle Feather Is Due to an α-Keratin (KRT75) Mutation That Causes a Defective Rachis
Source: PLOS journal article supplement (doi:10.1371/journal.pgen.1002748), 2012-07-19
Supplement: S11 (10.1371/journal.pgen.1002748.s011) [file journal.pgen.1002748.s011.pdf › journal.pgen.1002748.s011.pdf]

**Table S1. Primers designed to screen for the causative mutation in the candidate gene regions.**

| Gene Name | Ser. No. | Start <sup>a</sup> | End <sup>a</sup> | Forward primer | Forward primer sequence | Reverse primer | Reverse primer sequence |
|-----------|----------|--------------------|------------------|----------------|-------------------------|----------------|-------------------------|
| LOC426896 | A2       | 504379             | 504799           | LOC426896_fwd2 | AATACCCACATCCCCACACCC   | LOC426896_rev2 | ACAACCCAACCCCATCCCAC    |
| LOC768882 | B1       | 521896             | 522596           | LOC768882_fwd1 | CCTACCACAAACCTATCACC    | LOC768882_rev1 | CCTCCAAATCAATATCCCATTCC |
| LOC768882 | B3       | 524170             | 524515           | LOC768882_fwd3 | GGGATGTTTGTAAATGGGAGG   | LOC768882_rev3 | TGCCTTCAGCTCTCCTTATT    |
| LOC768882 | B4       | 524938             | 525568           | LOC768882_fwd4 | ATGGGATGGAATGCGGGGAA    | LOC768882_rev4 | GGACAAGGACAGGGATGCAG    |
| LOC768882 | B5       | 525390             | 525959           | LOC768882_fwd5 | GAGATTGAGAACGTGAAGAAG   | LOC768882_rev5 | AAGGAAAAGAGATGGAGTGT    |
| LOC768882 | B6       | 525940             | 526357           | LOC768882_fwd6 | ACACTCCATCTCTTTTCCTT    | LOC768882_rev6 | GTTTGCTTCCTTTCTCCTTT    |
| LOC768882 | B7       | 532077             | 532789           | LOC768882_fwd7 | CATTCATCCTCCTCCTCCTC    | LOC768882_rev7 | CTCCTCCAAATTTTGGCCCT    |
| LOC768882 | B8       | 535374             | 535838           | LOC768882_fwd8 | GGAGGGAGAGGAGAACAGGT    | LOC768882_rev8 | AGCCTGCAAAGGAAAATGAGT   |
| LOC768882 | B9       | 535879             | 536360           | LOC768882_fwd9 | GGTGGGCTGAGAAGTTTGGT    | LOC768882_rev9 | GGAAGGGAGGAGATGCTTTGT   |
| LOC768881 | C2       | 544762             | 545285           | LOC768881_fwd2 | ACCCITTCGGTTTCTCTCA     | LOC768881_rev2 | TTCTTTTCTCAGTCGGCCTT    |
| LOC431299 | D2       | 555725             | 556350           | LOC431299_fwd2 | GATTGCCCTGGATGTGGAGA    | LOC431299_rev2 | CCCATTGTACACACCTCCT     |
| LOC431299 | D3       | 556043             | 556613           | LOC431299_fwd3 | ACATCTTGTGTTCTCTCCCT    | LOC431299_rev3 | TGTTCTGCTGCTGTTTGCCT    |
| LOC431300 | E1       | 574421             | 575912           | LOC431300_fwd1 | GAGGAGATGGAGGTTGGTATG   | LOC431300_rev1 | GGACTGGAAGAAGGAGGTGA    |
| LOC431300 | E2       | 575893             | 577287           | LOC431300_fwd2 | TCACCTCCTTCTTCCAGTCC    | LOC431300_rev2 | ATCTTCTCATACTCCTGCCT    |
| LOC431300 | E4       | 577516             | 578120           | LOC431300_fwd4 | GCAGCCGGAATTTGAAATAGT   | LOC431300_rev4 | TACCTGGTCTCCTCCTCCTC    |
| LOC768978 | F1       | 596428             | 597876           | LOC768978_fwd1 | GTGTTTGGAGATTTCGGCTT    | LOC768978_rev1 | CTCCAGGTTCTTCCCTTTCTT   |
| LOC768978 | F2       | 596200             | 596869           | LOC768978_fwd2 | CCTCAACTCCTGTGATCCATTCT | LOC768978_rev2 | CAAATCCTATGCACCCACACT   |
| LOC768978 | F3       | 597856             | 598287           | LOC768978_fwd3 | AAGAAAGGGAAGAACCTGGA    | LOC768978_rev3 | CTGTTGGGAAAGGAGAAGAA    |
| LOC768978 | F4       | 598380             | 599795           | LOC768978_fwd4 | CCTTTCATGGGTTTATCTGGT   | LOC768978_rev4 | TCCAATTCTTCTTTGCTCTTCT  |
| LOC768978 | F5       | 599774             | 600379           | LOC768978_fwd5 | AGAAGAGCAAAGAAGAGTGGA   | LOC768978_rev5 | GATGGAGGTTTGCAGGCAGGA   |
| LOC768978 | F6       | 600328             | 600706           | LOC768978_fwd6 | CCTGCACTGTTGTCTCTCC     | LOC768978_rev6 | CCATCCCTTCATCCCCAGTTT   |
| LOC431301 | G1       | 618595             | 620243           | LOC431301_fwd1 | CATCCACCCAGAGCTCCTCA    | LOC431301_rev1 | GCAACGCTCCTCATTCTCCA    |
| LOC431301 | G2       | 618117             | 618874           | LOC431301_fwd2 | CTCCTTCACTTTCTTCCACC    | LOC431301_rev2 | CATCTCCCTCCTTTGTCCCA    |
| LOC431301 | G3       | 620216             | 621211           | LOC431301_fwd3 | AGAGAGGCTGGAGAATGAGGA   | LOC431301_rev3 | GTTGGAAAGCAGAGGTGGGG    |
| LOC431301 | G4       | 622860             | 623233           | LOC431301_fwd4 | TCAGCCCCACCTCTGCTTT     | LOC431301_rev4 | CGCACCTCCAGCTCTTCCTT    |
| LOC431301 | G5       | 623214             | 624229           | LOC431301_fwd5 | AAGGAAGAGCTGGAGGTGCG    | LOC431301_rev5 | AGGGTTTGTGTTGATGGAGGGT  |
| LOC431301 | G6       | 624207             | 624701           | LOC431301_fwd6 | AAACCCTCCATCAACAAAACC   | LOC431301_rev6 | CACTCAGCTCTTACCTACC     |

|           |    |        |        |                |                          |                |                         |
|-----------|----|--------|--------|----------------|--------------------------|----------------|-------------------------|
| LOC431301 | G7 | 624523 | 625236 | LOC431301 fwd7 | TCCCAGTGTAATGTTGTCCCC    | LOC431301_rev7 | ACCTGCTCTCTCTCCTTCC     |
| LOC769040 | H4 | 634103 | 635328 | LOC769040 fwd4 | CAGAAAAACAGCACAGGCAA     | LOC769040_rev4 | CTCCAGCTCCACCTTATTCA    |
| KRT75     | I1 | 642071 | 642748 | KRT75_fwd1     | TTTCCCCCGTTCCTGTTCTT     | KRT75_rev1     | CTCCTCCTGCTTTTCTTTCTT   |
| KRT75     | I2 | 642068 | 643216 | KRT75_fwd2     | CTCTTTCCCCCGTTCCTGTT     | KRT75_rev2     | CCATTTGGTCTCCAGCACTT    |
| KRT75     | I3 | 643120 | 643516 | KRT75_fwd3     | CGCTCTCCCTCTTCTCTTCT     | KRT75_rev3     | TTTGCTGCTGCGTGTTTCATT   |
| KRT75     | I4 | 645094 | 645978 | KRT75_fwd4     | GGAATGGGGAATGGAATAAAAGGG | KRT75_rev4     | TGCGATGATGCTGTTGAGGT    |
| LOC408041 | J1 | 655420 | 656063 | LOC408041_fwd1 | TCTTTCTTCTTTCCCTCCCAC    | LOC408041_rev1 | CCTGATCACCATTCTCTTCTT   |
| LOC408041 | J2 | 655424 | 657024 | LOC408041_fwd2 | TCTTCTTTCCCTCCCACTCCTT   | LOC408041_rev2 | CGTTTTTCATCCCTGCTCCT    |
| LOC408041 | J3 | 657006 | 657726 | LOC408041_fwd3 | GGAGCAGGGGATGAAAACGG     | LOC408041_rev3 | AATGGAGGAGGCAGAGGGAG    |
| LOC408041 | J4 | 657707 | 658362 | LOC408041_fwd4 | CTCCCTCTGCCTCCTCCATT     | LOC408041_rev4 | CTCATACTGCGCCTTCACCT    |
| LOC408041 | J5 | 658298 | 659147 | LOC408041_fwd5 | CCATGGACAACAACCGCAAC     | LOC408041_rev5 | TTTCCTTCCTTCCTTCCAATCCT |
| LOC408042 | K2 | 666186 | 666687 | LOC408042_fwd2 | TTCTGTGTGTGTCTTCTTCC     | LOC408042_rev2 | CCTCATATTGTGCCTTCACCT   |
| LOC408042 | K3 | 666667 | 668497 | LOC408042_fwd3 | AGGTGAAGGCACAATATGAGGA   | LOC408042_rev3 | TGGGATGTGAGGCTTTTGGA    |
| LOC426897 | L1 | 677158 | 677657 | LOC426897_fwd1 | ACCAAGAGAAGGAGCAGATCA    | LOC426897_rev1 | CCCAATACAAGCCTCCAACA    |
| LOC426897 | L2 | 676591 | 677404 | LOC426897_fwd2 | AATCTGCTTTCTCCATTGGT     | LOC426897_rev2 | TTTTTGTTGGGTAAGCCTTGT   |
| LOC426897 | L3 | 677639 | 679161 | LOC426897_fwd3 | GTTGGAGGCTTGATTGGGA      | LOC426897_rev3 | CCGCCTCTCTTTTCTTCTCT    |
| LOC426897 | L4 | 679142 | 680271 | LOC426897_fwd4 | AGAGAAGAAAAGAGAGGCGG     | LOC426897_rev4 | GAAGGGGATTGTGAAGAGGA    |
| LOC469091 | M1 | 680018 | 681329 | LOC469091_fwd1 | GGCAAGTCGACCATGTAAAG     | LOC469091_rev1 | AGGAGCAGAAAGAGCAAGAA    |
| LOC395772 | N1 | 690505 | 690765 | LOC395772_fwd1 | TCTTTCTGTGTTTTCCCTCCT    | LOC395772_rev1 | TGGTTGCTTTGCTTCTCTCT    |
| LOC395772 | N2 | 690581 | 691631 | LOC395772_fwd2 | TGGTGGATGAGGTTGTGGTG     | LOC395772_rev2 | GTTGGCTGGCGATGGAGTTG    |
| LOC395772 | N4 | 696860 | 698009 | LOC395772_fwd4 | ATTTTCATTCTTGGTGTGCG     | LOC395772_rev4 | TGAATAAAGTGGAGCTGGAGG   |
| LOC395772 | N5 | 703301 | 704000 | LOC395772_fwd5 | AGCTAAGTAAAGGGGGTGCAA    | LOC395772_rev5 | GGATAAAAGGGGAAGCGGAG    |

<sup>a</sup>Genomic positions within the linkage group chrE22C19W28\_E50C23.
