# Supplementary material for: The Chicken Frizzle Feather Is Due to an α-Keratin (KRT75) Mutation That Causes a Defective Rachis
Source: PLOS journal article supplement (doi:10.1371/journal.pgen.1002748), 2012-07-19
Supplement: S12 (10.1371/journal.pgen.1002748.s012) [file journal.pgen.1002748.s012.pdf › journal.pgen.1002748.s012.pdf]

**Table S2. Sequence variants within the linkage group chrE22C19W28\_E50C23**

| <b>Serial Number<sup>a</sup></b> | <b>Position<sup>b</sup></b> | <b>Reference genome<sup>c</sup></b> | <b>Frizzle<sup>d</sup></b> | <b>Variant type<sup>e</sup></b>         | <b>Coding or noncoding<sup>e</sup></b> |
|----------------------------------|-----------------------------|-------------------------------------|----------------------------|-----------------------------------------|----------------------------------------|
| A2                               | 504442                      | T                                   | A                          | SNP                                     | Noncoding                              |
| A2                               | 504547                      | A                                   | G                          | SNP                                     | Noncoding                              |
| B1                               | 522166                      | T                                   | C                          | Synonymous SNP                          | Coding                                 |
| B1                               | 522488                      | C                                   | T                          | SNP                                     | Noncoding                              |
| B3                               | 524198                      | T                                   | C                          | SNP                                     | Noncoding                              |
| B3                               | 524268                      | G                                   | A                          | SNP                                     | Noncoding                              |
| B3                               | 524289                      | T                                   | C                          | SNP                                     | Noncoding                              |
| B3                               | 524307-524310               | AAAC                                | -                          | SNP                                     | Noncoding                              |
| B3                               | 524491                      | T                                   | G                          | SNP                                     | Noncoding                              |
| B4                               | 525048                      | A                                   | G                          | Synonymous SNP                          | Coding                                 |
| B4                               | 525160                      | A                                   | T                          | Nonsynonymous SNP (S to C) <sup>f</sup> | Coding                                 |
| B4                               | 525220                      | C                                   | A                          | SNP                                     | Noncoding                              |
| B4                               | 525255                      | A                                   | C                          | SNP                                     | Noncoding                              |
| B4                               | 525528                      | C                                   | A                          | SNP                                     | Noncoding                              |
| B5                               | 525797                      | G                                   | A                          | SNP                                     | Noncoding                              |
| B6                               | 525808                      | G                                   | T                          | SNP                                     | Noncoding                              |
| B6                               | 525865                      | T                                   | C                          | SNP                                     | Noncoding                              |
| B6                               | 526043                      | G                                   | A                          | SNP                                     | Noncoding                              |
| B6                               | 526089                      | G                                   | A                          | SNP                                     | Noncoding                              |
| B6                               | 526231                      | A                                   | C                          | SNP                                     | Noncoding                              |
| B6                               | 526233                      | A                                   | G                          | SNP                                     | Noncoding                              |
| B6                               | 526254                      | C                                   | G                          | SNP                                     | Noncoding                              |
| B6                               | 526257                      | C                                   | G                          | SNP                                     | Noncoding                              |
| B7                               | 532697                      | A                                   | G                          | SNP                                     | Noncoding                              |
| B7                               | 532707                      | A                                   | C                          | SNP                                     | Noncoding                              |
| B8                               | 535589                      | T                                   | C                          | SNP                                     | Noncoding                              |

|    |               |     |   |                                   |           |
|----|---------------|-----|---|-----------------------------------|-----------|
| B8 | 535831        | -   | T | Insertion                         | Noncoding |
| C2 | 545226-545228 | CAC | - | Frame-shift deletion <sup>g</sup> | Coding    |
| D2 | 556094        | C   | T | SNP                               | Noncoding |
| D3 | 556094        | C   | T | SNP                               | Noncoding |
| E1 | 574608        | A   | G | SNP                               | Noncoding |
| E1 | 574610        | G   | C | SNP                               | Noncoding |
| E1 | 574737        | G   | A | SNP                               | Noncoding |
| E1 | 574749        | T   | A | SNP                               | Noncoding |
| E1 | 575274        | T   | C | SNP                               | Noncoding |
| E1 | 575663        | C   | G | SNP                               | Noncoding |
| E2 | 576436        | G   | A | SNP                               | Noncoding |
| E2 | 576579        | A   | C | SNP                               | Noncoding |
| E2 | 576883        | C   | A | SNP                               | Noncoding |
| E2 | 576893        | G   | A | SNP                               | Noncoding |
| E4 | 577719        | A   | C | SNP                               | Noncoding |
| E4 | 577720        | A   | C | SNP                               | Noncoding |
| E4 | 577721        | G   | C | SNP                               | Noncoding |
| F3 | 597969        | A   | G | SNP                               | Noncoding |
| F4 | 598543        | C   | T | SNP                               | Noncoding |
| F4 | 598587        | G   | C | SNP                               | Noncoding |
| F4 | 598589        | A   | G | SNP                               | Noncoding |
| F4 | 598636        | A   | G | SNP                               | Noncoding |
| G1 | 618713        | G   | T | SNP                               | Noncoding |
| G1 | 618928        | A   | G | SNP                               | Noncoding |
| G1 | 618934        | G   | A | SNP                               | Noncoding |
| G2 | 618165        | T   | C | SNP                               | Noncoding |
| G2 | 618713        | G   | T | SNP                               | Noncoding |
| G3 | 620444        | A   | G | SNP                               | Noncoding |

|    |               |     |   |                |           |
|----|---------------|-----|---|----------------|-----------|
| G3 | 620478        | T   | C | SNP            | Noncoding |
| G3 | 620581        | T   | C | SNP            | Noncoding |
| G3 | 620673        | C   | G | SNP            | Noncoding |
| G3 | 620838        | A   | T | SNP            | Noncoding |
| G3 | 620858        | T   | G | SNP            | Noncoding |
| G3 | 620859        | T   | C | SNP            | Noncoding |
| G3 | 620890        | A   | T | SNP            | Noncoding |
| G3 | 620978        | G   | C | SNP            | Noncoding |
| G3 | 621041        | G   | T | SNP            | Noncoding |
| G4 | 622859        | A   | T | SNP            | Noncoding |
| G4 | 623234-623319 | ... | - | 86-bp deletion | Noncoding |
| G5 | 623387        | A   | G | SNP            | Noncoding |
| G5 | 623517        | T   | C | SNP            | Noncoding |
| G5 | 623609        | C   | T | SNP            | Noncoding |
| G5 | 623610        | A   | G | SNP            | Noncoding |
| G5 | 623623        | A   | G | SNP            | Noncoding |
| G5 | 623626        | A   | G | SNP            | Noncoding |
| G7 | 624694        | G   | C | SNP            | Noncoding |
| G7 | 625199        | G   | A | SNP            | Noncoding |
| H4 | 634622        | A   | G | SNP            | Noncoding |
| H4 | 634654        | T   | A | SNP            | Noncoding |
| H4 | 634707        | C   | T | SNP            | Noncoding |
| H4 | 634708        | C   | G | SNP            | Noncoding |
| H4 | 634945        | G   | T | SNP            | Noncoding |
| H4 | 634946        | C   | T | SNP            | Noncoding |
| H4 | 634963        | C   | T | SNP            | Noncoding |
| H4 | 635102        | T   | C | SNP            | Noncoding |
| H4 | 635131        | G   | A | SNP            | Noncoding |

|    |        |   |   |                                         |           |
|----|--------|---|---|-----------------------------------------|-----------|
| H4 | 635209 | T | C | SNP                                     | Noncoding |
| I1 | 642283 | C | T | Synonymous SNP                          | Coding    |
| I1 | 642514 | T | C | Synonymous SNP                          | Coding    |
| I2 | 642514 | T | C | Synonymous SNP                          | Coding    |
| I2 | 642821 | C | T | SNP                                     | Noncoding |
| I2 | 642876 | C | A | SNP                                     | Noncoding |
| I2 | 643029 | G | T | SNP                                     | Noncoding |
| I2 | 643088 | C | T | SNP                                     | Noncoding |
| I2 | 643149 | T | - | Deletion                                | Noncoding |
| I3 | 643468 | T | - | Deletion                                | Noncoding |
| I4 | 645216 | G | A | SNP                                     | Noncoding |
| I4 | 645239 | T | C | SNP                                     | Noncoding |
| I4 | 645251 | G | A | SNP                                     | Noncoding |
| I4 | 645318 | G | A | SNP                                     | Noncoding |
| I4 | 645390 | A | T | Nonsynonymous SNP (K to N) <sup>g</sup> | Coding    |
| I4 | 645493 | T | C | SNP                                     | Noncoding |
| I4 | 645613 | G | A | SNP                                     | Noncoding |
| I4 | 645627 | T | C | SNP                                     | Noncoding |
| I4 | 645838 | T | C | SNP                                     | Noncoding |
| I4 | 645880 | T | C | SNP                                     | Noncoding |
| J1 | 646203 | G | A | SNP                                     | Noncoding |
| J1 | 646267 | G | A | SNP                                     | Noncoding |
| J1 | 646363 | G | A | SNP                                     | Noncoding |
| J1 | 646677 | A | G | SNP                                     | Noncoding |
| J1 | 646695 | T | C | SNP                                     | Noncoding |
| J1 | 646720 | T | C | SNP                                     | Noncoding |
| J1 | 646747 | A | G | SNP                                     | Noncoding |
| J1 | 646848 | G | T | SNP                                     | Noncoding |

|           |                      |            |          |                                         |                               |
|-----------|----------------------|------------|----------|-----------------------------------------|-------------------------------|
| J1        | 646993               | C          | T        | SNP                                     | Noncoding                     |
| J2        | 655694               | G          | A        | Nonsynonymous SNP (S to N) <sup>h</sup> | Coding                        |
| J2        | 656017               | A          | G        | SNP                                     | Noncoding                     |
| J2        | 656151               | T          | C        | SNP                                     | Noncoding                     |
| J2        | 656235               | T          | C        | SNP                                     | Noncoding                     |
| J2        | 656278               | A          | G        | SNP                                     | Noncoding                     |
| J2        | 656288               | A          | C        | SNP                                     | Noncoding                     |
| J2        | 656370               | T          | A        | SNP                                     | Noncoding                     |
| J2        | 656373-656374        | TT         | -        | Deletion                                | Noncoding                     |
| J3        | 657221               | T          | C        | SNP                                     | Noncoding                     |
| J3        | 657248               | C          | T        | SNP                                     | Noncoding                     |
| J3        | 657257               | T          | G        | SNP                                     | Noncoding                     |
| J3        | 657290               | G          | A        | SNP                                     | Noncoding                     |
| J3        | 657297               | G          | A        | SNP                                     | Noncoding                     |
| J3        | 657553               | C          | T        | SNP                                     | Noncoding                     |
| J4        | 657864               | T          | C        | SNP                                     | Noncoding                     |
| J4        | 657909               | A          | C        | SNP                                     | Noncoding                     |
| J4        | 657976               | T          | C        | Synonymous SNP                          | Coding                        |
| J4        | 657982               | T          | C        | Synonymous SNP                          | Coding                        |
| J4        | 658290               | A          | G        | Synonymous SNP                          | Coding                        |
| J5        | 658380               | T          | C        | Synonymous SNP                          | Coding                        |
| <b>J5</b> | <b>658389-658472</b> | <b>...</b> | <b>-</b> | <b>84-dp deletion<sup>i</sup></b>       | <b>Coding &amp; noncoding</b> |
| J5        | 658640               | A          | G        | SNP                                     | Noncoding                     |
| J5        | 658653               | G          | A        | SNP                                     | Noncoding                     |
| J5        | 658733               | C          | A        | SNP                                     | Noncoding                     |
| J5        | 658826               | G          | A        | SNP                                     | Noncoding                     |
| J5        | 658830               | C          | T        | SNP                                     | Noncoding                     |
| J5        | 658940               | G          | C        | SNP                                     | Noncoding                     |

|    |        |   |   |                |           |
|----|--------|---|---|----------------|-----------|
| J5 | 658959 | T | C | Synonymous SNP | Coding    |
| J5 | 659067 | T | C | Synonymous SNP | Coding    |
| J5 | 659088 | G | A | SNP            | Noncoding |
| K3 | 667772 | T | C | Synonymous SNP | Coding    |
| K3 | 668083 | C | G | SNP            | Noncoding |
| K3 | 668149 | T | A | Synonymous SNP | Coding    |
| K3 | 668253 | C | T | Synonymous SNP | Coding    |
| L1 | 677360 | C | T | SNP            | Noncoding |
| L1 | 677442 | T | C | SNP            | Noncoding |
| L1 | 677466 | C | T | SNP            | Noncoding |
| L1 | 677500 | G | A | SNP            | Noncoding |
| L1 | 677518 | C | G | SNP            | Noncoding |
| L2 | 676657 | T | C | SNP            | Noncoding |
| L2 | 676821 | G | A | SNP            | Noncoding |
| L2 | 677048 | T | C | SNP            | Noncoding |
| L2 | 677082 | G | A | SNP            | Noncoding |
| L2 | 677275 | A | G | SNP            | Noncoding |
| L2 | 677360 | C | T | SNP            | Noncoding |
| L3 | 677915 | G | T | SNP            | Noncoding |
| L3 | 678280 | A | C | SNP            | Noncoding |
| L3 | 678484 | T | C | SNP            | Noncoding |
| L4 | 679752 | G | A | SNP            | Noncoding |
| L4 | 679897 | T | C | SNP            | Noncoding |
| L4 | 679976 | C | T | SNP            | Noncoding |
| L4 | 679989 | A | G | SNP            | Noncoding |
| L4 | 680120 | A | G | SNP            | Noncoding |
| M1 | 680120 | A | G | SNP            | Noncoding |
| N1 | 688128 | G | T | Synonymous SNP | Coding    |

|    |        |   |   |                |           |
|----|--------|---|---|----------------|-----------|
| N1 | 688161 | G | T | Synonymous SNP | Coding    |
| N1 | 688173 | A | G | Synonymous SNP | Coding    |
| N2 | 690741 | G | A | SNP            | Noncoding |
| N2 | 690744 | G | A | SNP            | Noncoding |
| N2 | 690880 | T | A | SNP            | Noncoding |
| N2 | 690939 | A | G | SNP            | Noncoding |
| N2 | 690967 | G | A | SNP            | Noncoding |
| N2 | 691110 | A | G | SNP            | Noncoding |
| N2 | 691125 | A | G | SNP            | Noncoding |
| N2 | 691133 | C | T | SNP            | Noncoding |
| N2 | 691162 | C | A | SNP            | Noncoding |
| N2 | 691163 | C | A | SNP            | Noncoding |
| N2 | 691259 | G | A | SNP            | Noncoding |
| N4 | 697062 | A | G | Synonymous SNP | Coding    |
| N4 | 697179 | G | A | Synonymous SNP | Coding    |
| N4 | 697298 | G | A | SNP            | Noncoding |
| N4 | 697306 | G | C | SNP            | Noncoding |
| N4 | 697568 | A | T | SNP            | Noncoding |
| N4 | 697754 | G | A | SNP            | Noncoding |
| N4 | 697758 | C | T | SNP            | Noncoding |
| N5 | 703807 | A | G | Synonymous SNP | Coding    |
| N5 | 703879 | G | A | Synonymous SNP | Coding    |

<sup>a</sup>Primers used to obtain the sequences from which the variants were discovered are listed in Table S1.

<sup>b</sup>Genomic positions within the linkage group chrE22C19W28\_E50C23.

<sup>c</sup>Polymorphisms in the chicken reference genome (WUGSC 2.1/galGal3) [1]. Sequence longer than 80 bp are showed as “...”.

<sup>d</sup>Variants detected in the frizzle chicken compared to the chicken reference genome.

<sup>e</sup>Variants are annotated using the Ensembl genome database (<http://www.ensembl.org/>).

<sup>f</sup>The amino acid substitution is predicted to affect protein functions by the bioinformatics tool SIFT [2,3,4], but the confidence in this prediction is low because the sequences used were not diverse enough. The effect of this SNP has not been experimentally studied.

<sup>g</sup>The same variants were also found in the white leghorn chicken with normal feathers. The effect of these SNPs have not been experimentally studied.

<sup>h</sup>The same variant has also been reported (GenBank accession number AY574985.1).

<sup>i</sup>This sequence has been submitted to GenBank with the accession number JQ013796.

### **Reference:**

1. Hillier LW, Miller W, Birney E, Warren W, Hardison RC, et al. (2004) Sequence and comparative analysis of the chicken genome provide unique perspectives on vertebrate evolution. *Nature* 432: 695-716.
2. Ng PC, Henikoff S (2001) Predicting deleterious amino acid substitutions. *Genome Res* 11: 863-874.
3. Ng PC, Henikoff S (2003) SIFT: Predicting amino acid changes that affect protein function. *Nucleic Acids Res* 31: 3812-3814.
4. Kumar P, Henikoff S, Ng PC (2009) Predicting the effects of coding non-synonymous variants on protein function using the SIFT algorithm. *Nature Protocols* 4: 1073-1082.
